# Supplementary material
Source: ML conference proceedings conference paper supplement (https://aclanthology.org/2026.semeval-1.120)

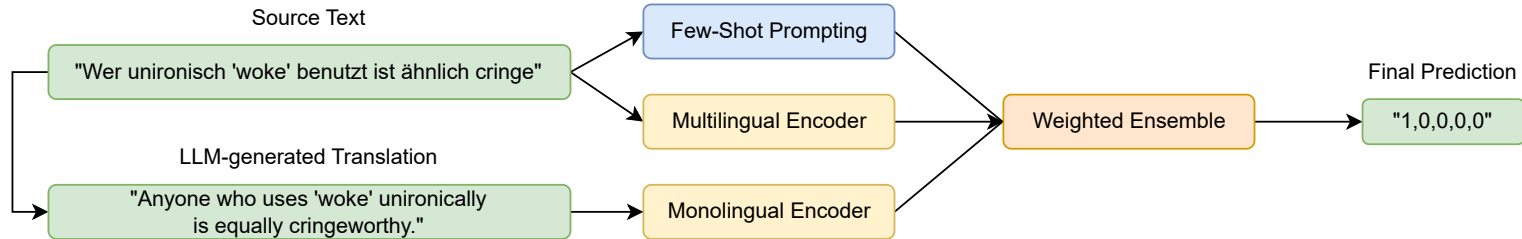

Supplement: SupplementaryMaterial [file semeval_pipeline.pdf › semeval_pipeline.pdf]
